# Supplementary material for: Development of Polymeric-Based Formulation as Potential Smart Colonic Drug Delivery System
Source: MDPI journal article supplement (doi:10.3390/polym14173697), 2022-09-05
Supplement: s1 [file s1]

## **Supporting Information**

### **Development of Polymeric-Based Formulation as Potential Smart Colonic Drug Delivery System**

Mohammad F. Bayan <sup>1,\*</sup>, Saeed M. Marji <sup>1</sup>, Mutaz S. Salem <sup>1,2</sup>, M. Yasmin Begum <sup>3</sup>, Kumarappan Chidambaram <sup>4,\*</sup> and Balakumar Chandrasekaran <sup>5</sup>

<sup>1</sup>Faculty of Pharmacy, Philadelphia University, P.O. Box 1, Amman 19392, Jordan

<sup>2</sup>Faculty of Pharmacy, Jordan University of Science and Technology, P.O. Box 3030, Irbid 22110, Jordan

<sup>3</sup>Department of Pharmaceutics, School of Pharmacy, King Khalid University, Abha 61421, Saudi Arabia

<sup>4</sup>Department of Pharmacology, School of Pharmacy, King Khalid University, Abha 62529, Saudi Arabia

<sup>5</sup>Department of Pharmaceutical Chemistry, School of Pharmacy, ITM University, Gwalior 474001, India

\*Correspondence: mbayan01@qub.ac.uk (M.F.B.); kumarappan@kku.edu.sa (K.C.)

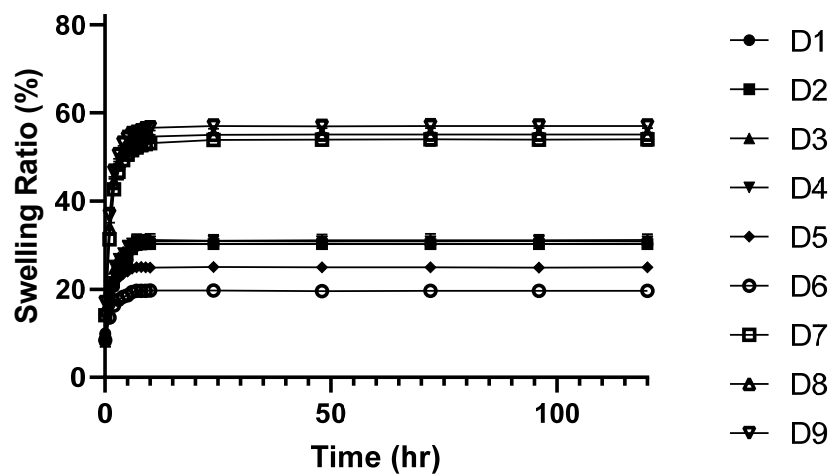

Figure S1: The swelling profile of the polymeric formulations (mean  $\pm$  SD, n=3) at pH 1.2.

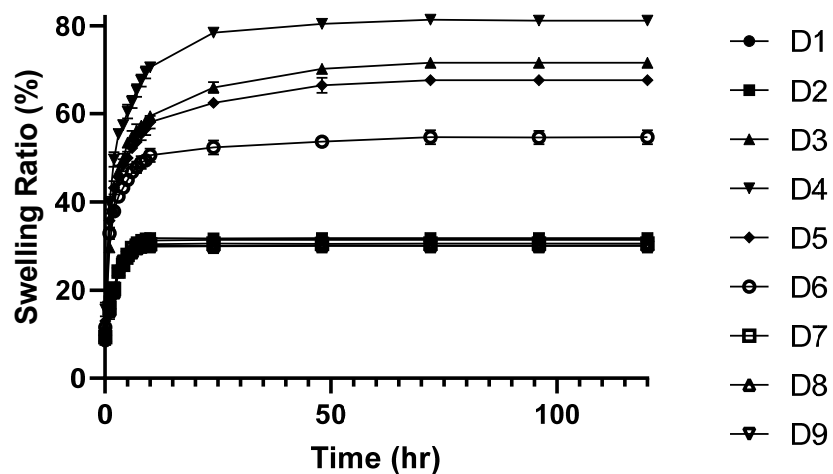

Figure S2: The swelling profile of the polymeric formulations (mean  $\pm$  SD, n=3) at pH 7.4.

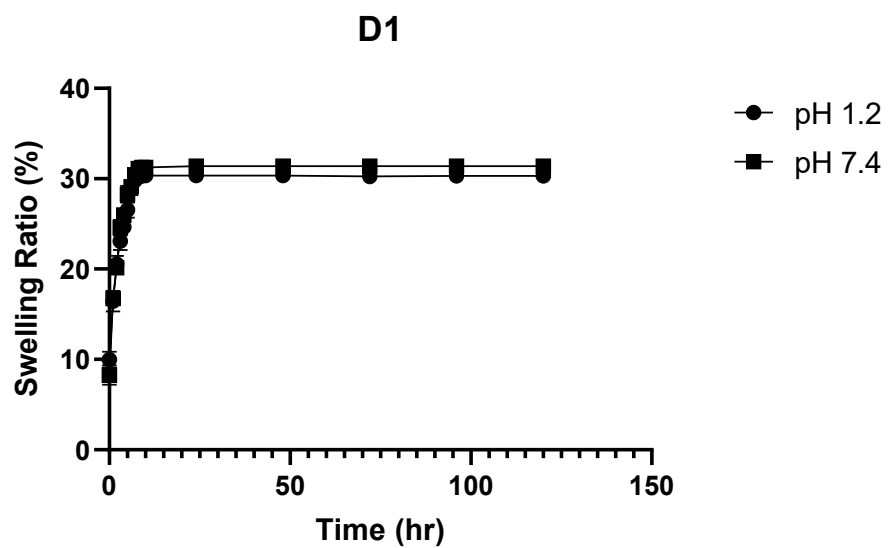

Figure S3: The swelling profile of D1 (mean  $\pm$  SD, n=3) at each pH.

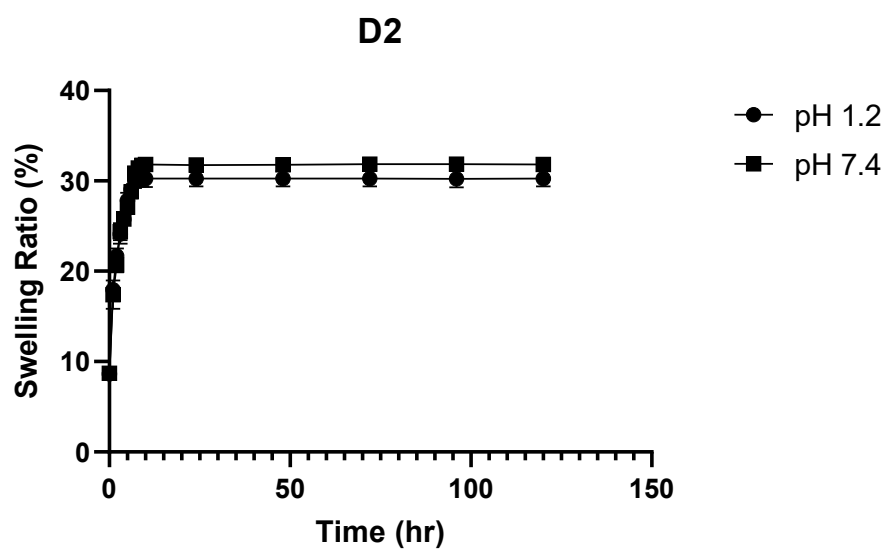

Figure S4: The swelling profile of D2 (mean  $\pm$  SD, n=3) at each pH.

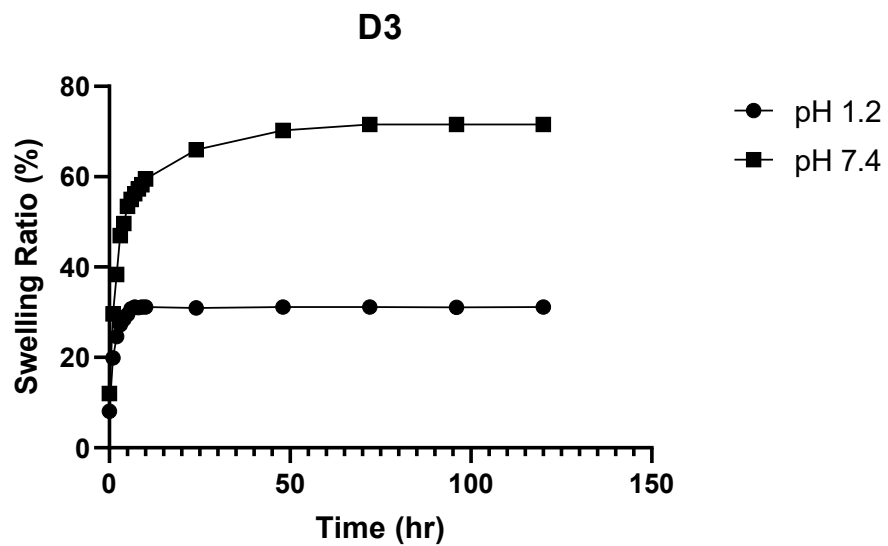

Figure S5: The swelling profile of D3 (mean  $\pm$  SD, n=3) at each pH.

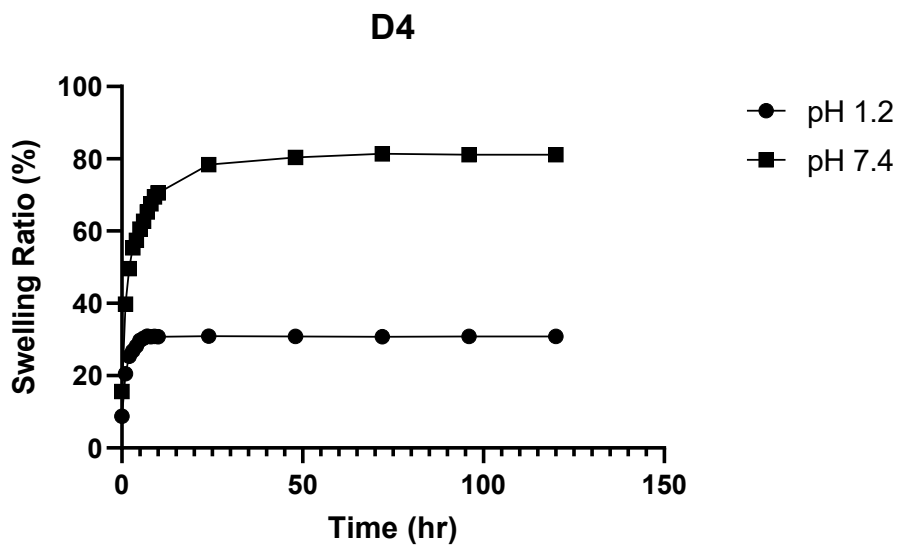

Figure S6: The swelling profile of D4 (mean  $\pm$  SD, n=3) at each pH.

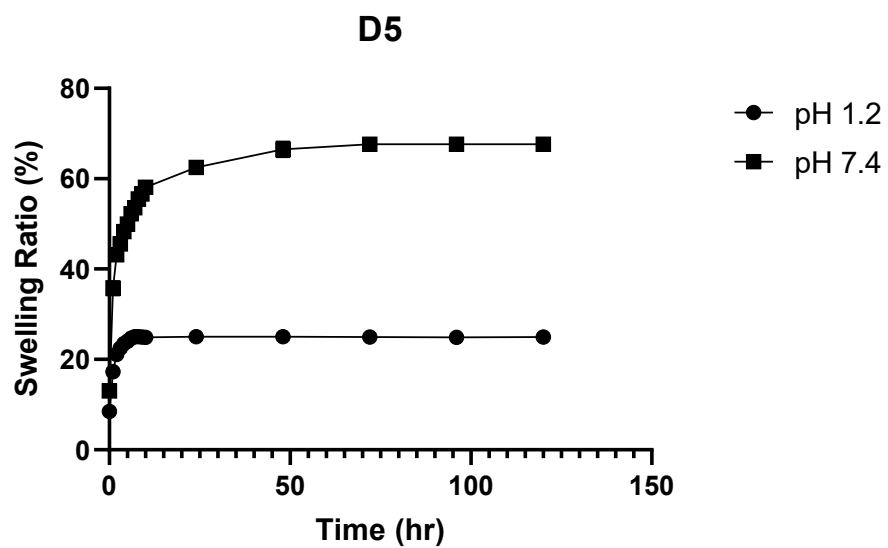

Figure S7: The swelling profile of D5 (mean  $\pm$  SD, n=3) at each pH.

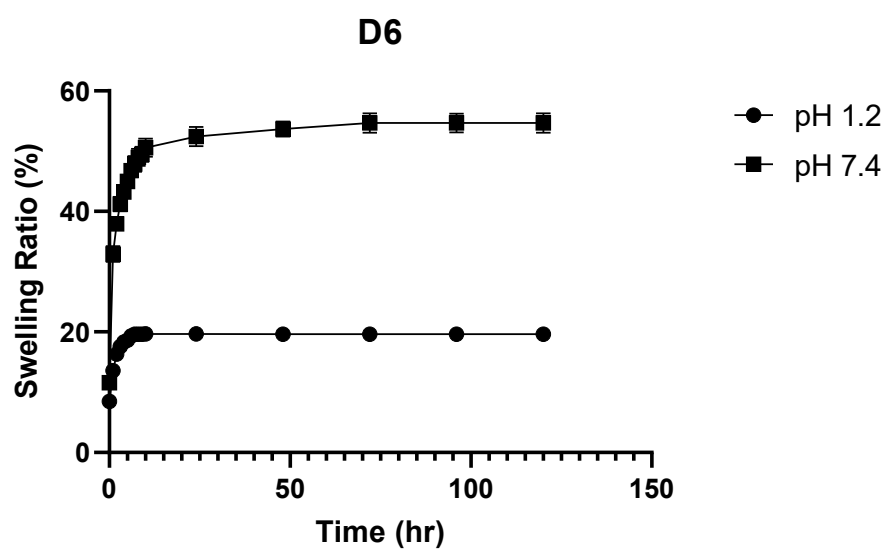

Figure S8: The swelling profile of D6 (mean  $\pm$  SD, n=3) at each pH.

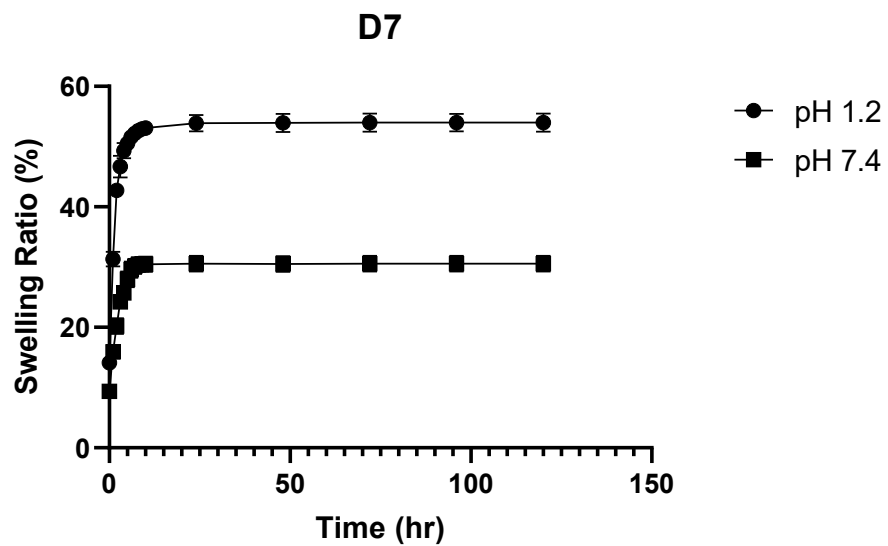

Figure S9: The swelling profile of D7 (mean  $\pm$  SD, n=3) at each pH.

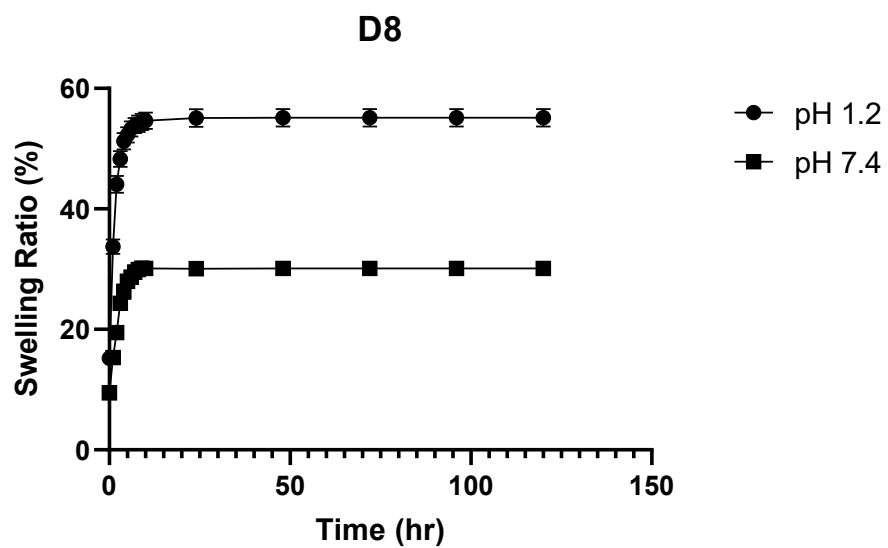

Figure S10: The swelling profile of D8 (mean  $\pm$  SD, n=3) at each pH.

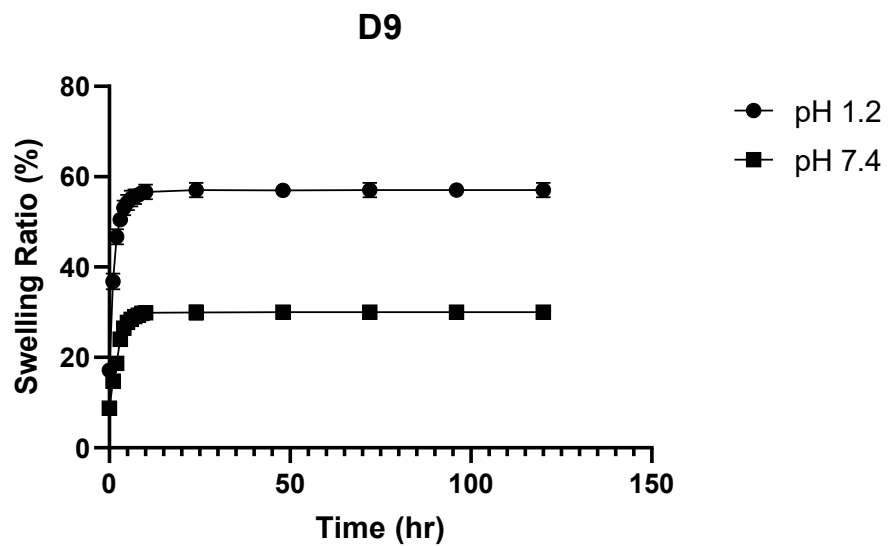

**Figure S11: The swelling profile of D9 (mean  $\pm$  SD, n=3) at each pH.**

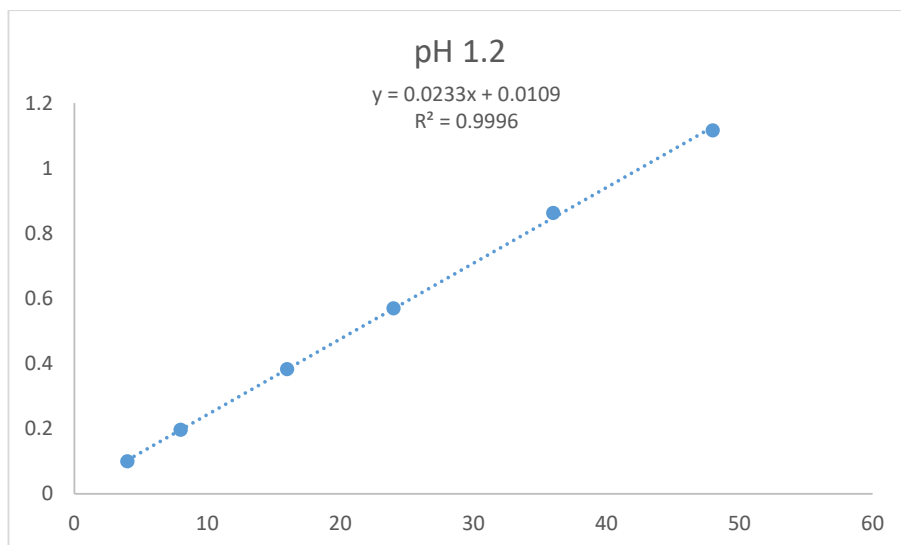

**Figure S12: Calibration curve of 5-amino salicylic acid at pH 1.2**

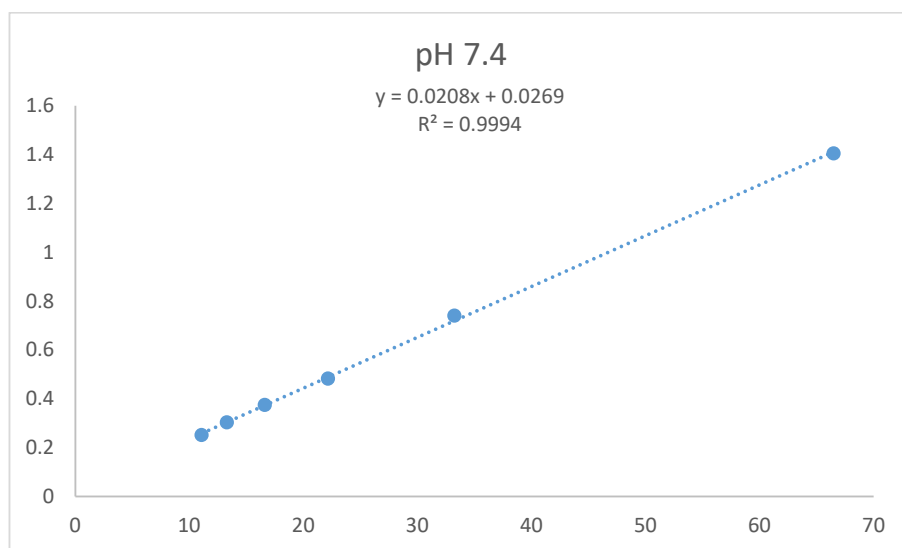

Figure S13: Calibration curve of 5-amino salicylic acid at pH 7.4

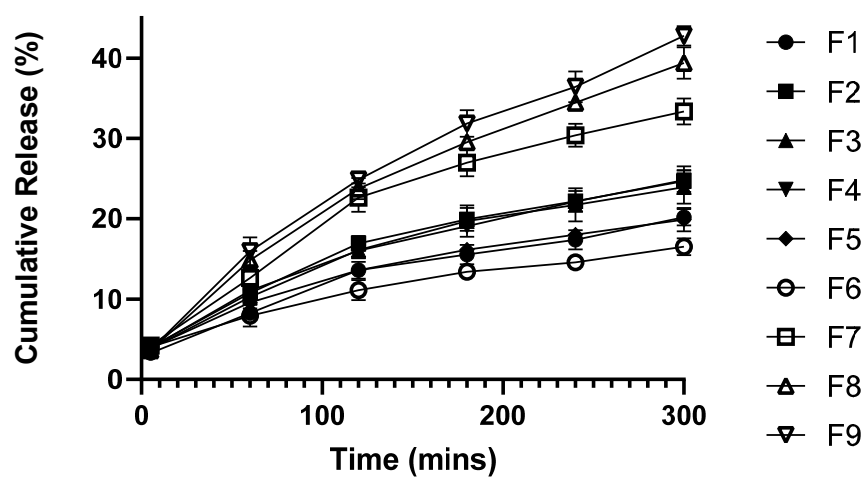

Figure S14: The release profile of the polymeric formulations (mean  $\pm$  SD, n=3) at pH 1.2.



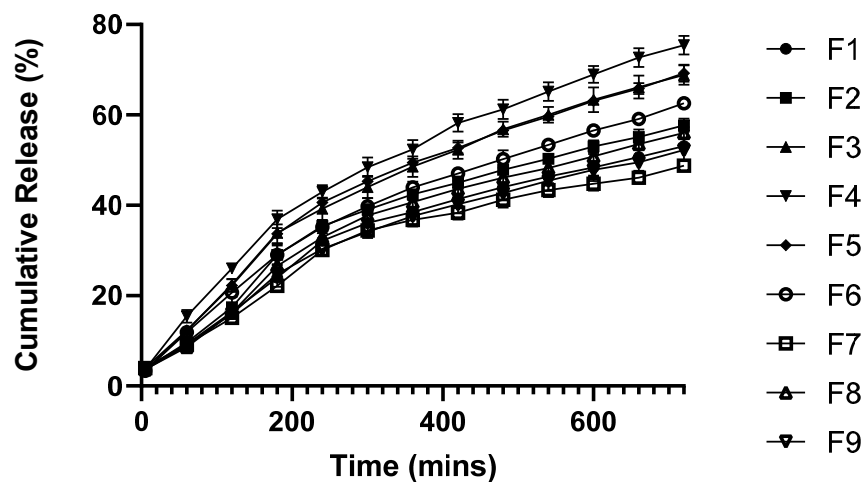

Figure S15: The release profile of the polymeric formulations (mean  $\pm$  SD, n=3) at pH 7.4.

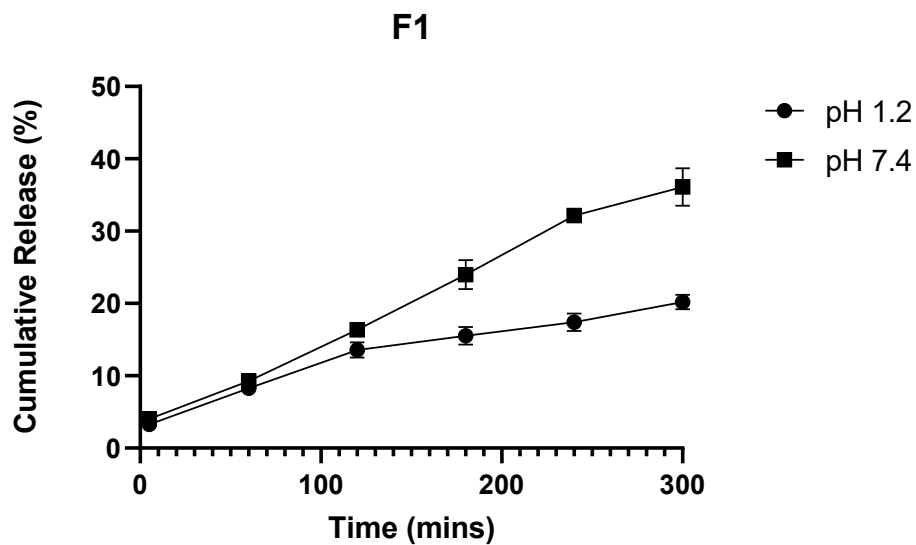

Figure S16: The release profile of F1 (mean  $\pm$  SD, n=3) at each pH.

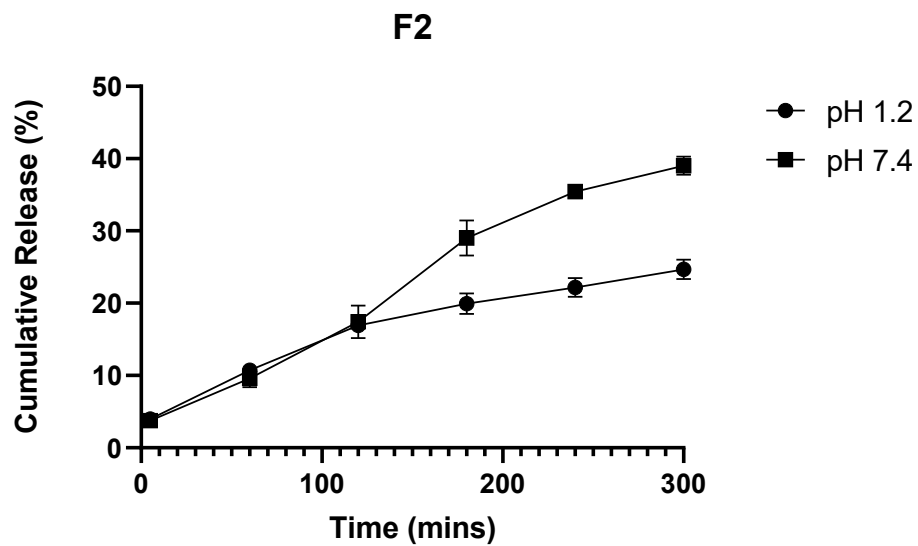

Figure S17: The release profile of F2 (mean  $\pm$  SD, n=3) at each pH.

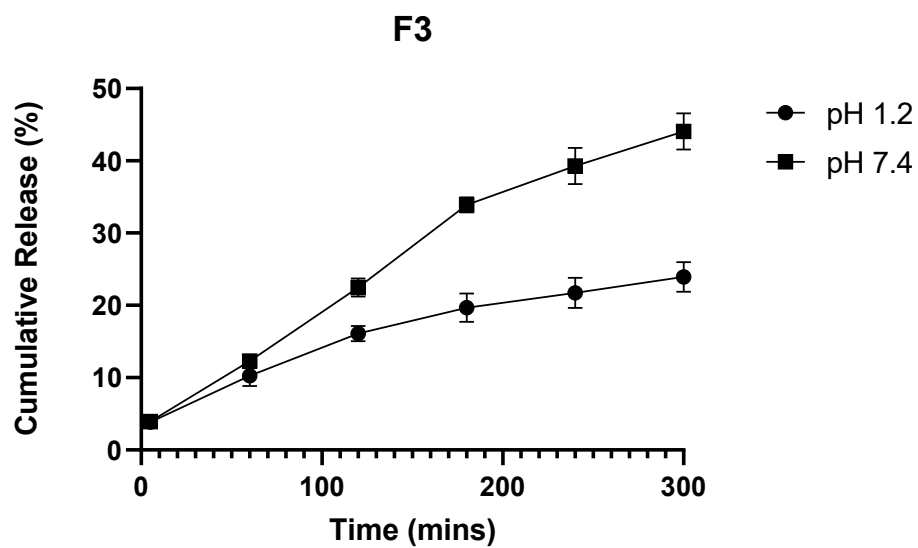

Figure S18: The release profile of F3 (mean  $\pm$  SD, n=3) at each pH.

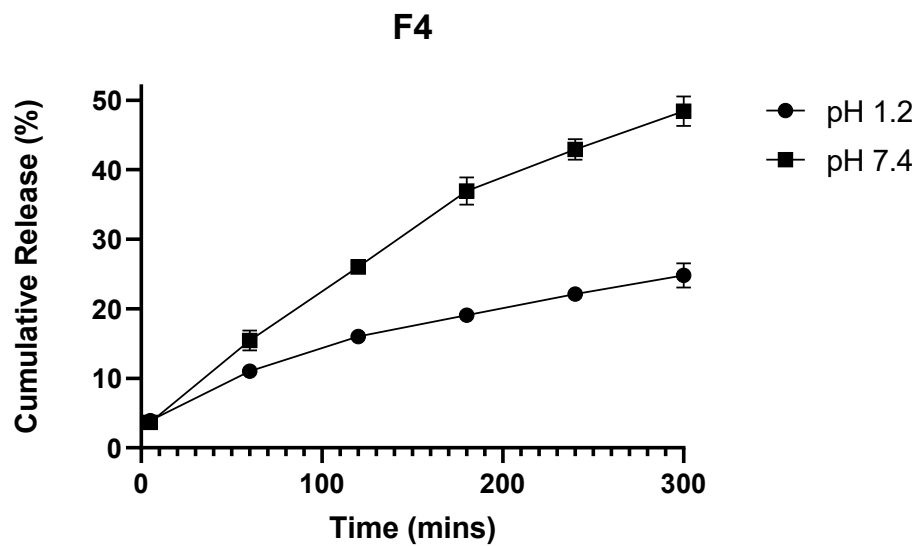

Figure S19: The release profile of F4 (mean  $\pm$  SD, n=3) at each pH.

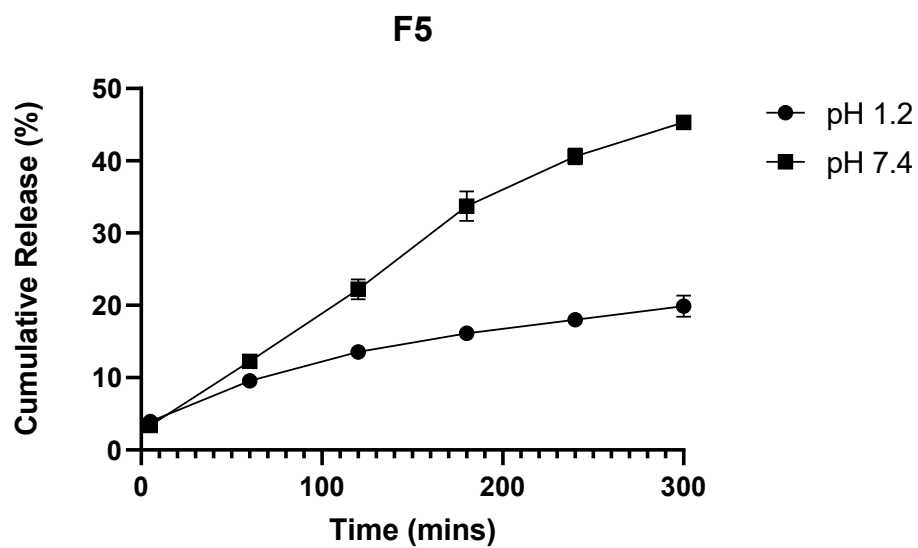

Figure S20: The release profile of F5 (mean  $\pm$  SD, n=3) at each pH.

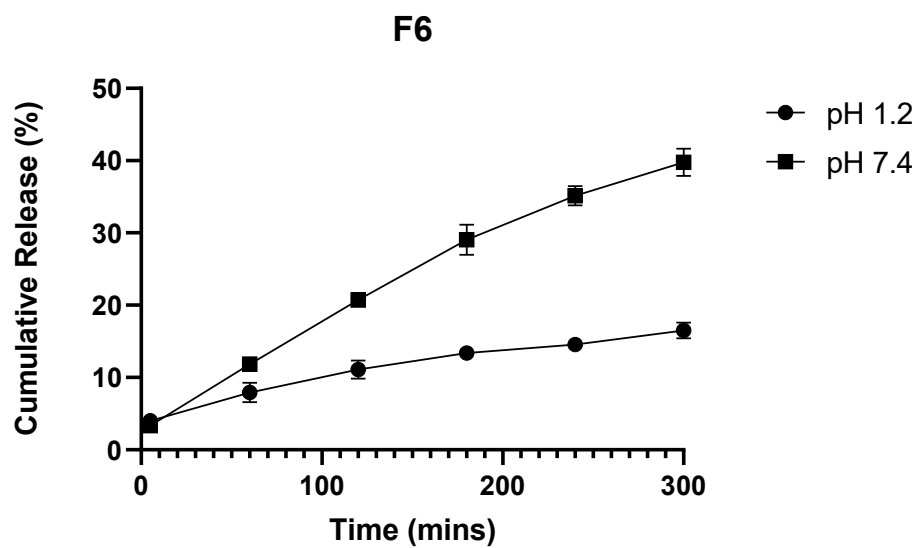

Figure S21: The release profile of F6 (mean  $\pm$  SD, n=3) at each pH.

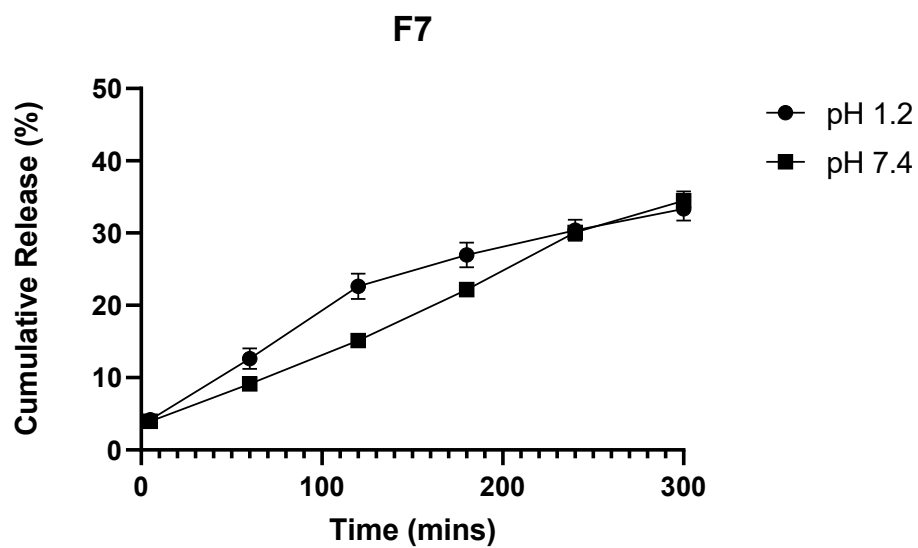

Figure S22: The release profile of F7 (mean  $\pm$  SD, n=3) at each pH.

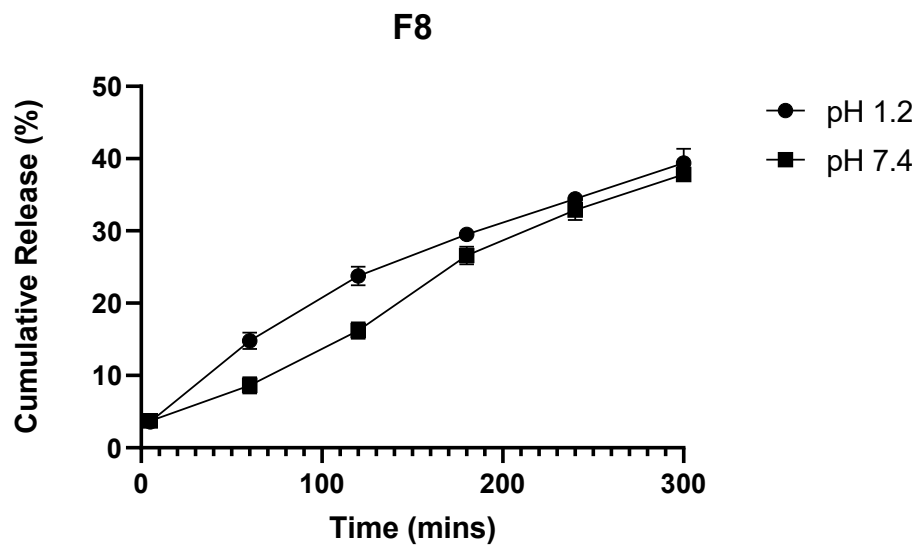

Figure S23: The release profile of F8 (mean  $\pm$  SD, n=3) at each pH.

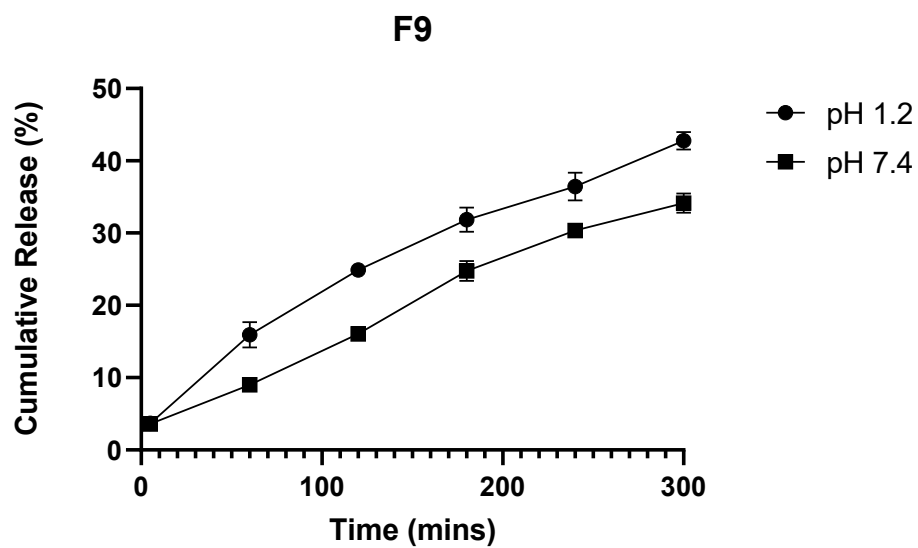

Figure S24: The release profile of F9 (mean  $\pm$  SD, n=3) at each pH.
